# Supplementary material
Source: Springer Nature journal article supplement (https://www.springermedizin.de/resource/supplementary/12936_2011_2043_MOESM1_ESM.pdf/9543398)
Supplement: MOESM1 [file 9543398]

A)

|       |        |   |   |   |   |   |   |   |   |   |   |   |   |   |   |   |   |   |                                                                        |            |       |
|-------|--------|---|---|---|---|---|---|---|---|---|---|---|---|---|---|---|---|---|------------------------------------------------------------------------|------------|-------|
| PER01 | NKLKQP | 1 | 1 | 1 | 2 | 1 | 1 | 1 | 1 | 2 | 2 | 1 | 2 | 1 | 2 | 2 | 2 | 2 | GNGAGGQAAGGNAGGQGNNEGANAPNEKSVKEYLDKVRATVGTETWTPCSVTCGVGVRVRRRVNAANKKP |            |       |
| PER02 | .....  | 1 | 1 | 1 | 1 | 1 | 1 | 1 | 1 | 3 | 1 | 1 | 1 | 1 | 1 | 2 | 2 | 2 | .....                                                                  |            |       |
| PER03 | ..V... | 1 | 1 | 1 | 1 | 1 | 3 | 1 | 1 | 1 | 1 | 1 | 1 | 1 | 1 | 1 | 1 | 1 | .....                                                                  |            |       |
| PER04 | .....  | 1 | 1 | 1 | 2 | 1 | 1 | 1 | 1 | 2 | 2 | 1 | 2 | 1 | 2 | 1 | 6 | 2 | 2                                                                      | 2          | ..... |
| PER05 | ..V... | 1 | 1 | 1 | 2 | 1 | 1 | 1 | 1 | 2 | 2 | 1 | 2 | 1 | 2 | 1 | 2 | 2 | 2                                                                      | 2          | ..... |
| PER06 | .....  | 1 | 1 | 1 | 1 | 2 | 1 | 1 | 1 | 1 | 2 | 1 | 2 | 1 | 2 | 1 | 2 | 2 | 2                                                                      | .DR.A..... |       |
| PER07 | .....  | 1 | 1 | 1 | 1 | 1 | 3 | 1 | 1 | 1 | 1 | 1 | 1 | 1 | 1 | 1 | 1 | 1 | .....                                                                  |            |       |
| PER08 | ..V... | 1 | 1 | 2 | 1 | 1 | 1 | 1 | 1 | 1 | 3 | 1 | 1 | 1 | 1 | 1 | 2 | 2 | 2                                                                      | .....      |       |
| PER09 | .....  | 1 | 1 | 1 | 2 | 1 | 1 | 1 | 1 | 2 | 2 | 1 | 2 | 1 | 2 | 2 | 2 | 2 | 2                                                                      | .....      |       |
| PER10 | .....  | 1 | 1 | 1 | 1 | 1 | 1 | 1 | 1 | 5 | 2 | 1 | 1 | 1 | 1 | 2 | 2 | 2 | 2                                                                      | .....      |       |
| PER11 | .....  | 1 | 1 | 1 | 1 | 1 | 1 | 1 | 1 | 1 | 2 | 1 | 2 | 1 | 2 | 1 | 2 | 2 | 2                                                                      | .....      |       |
| PER12 | .....  | 1 | 1 | 1 | 1 | 3 | 1 | 1 | 1 | 1 | 1 | 1 | 1 | 1 | 1 | 1 | 1 | 1 | .....                                                                  |            |       |
| PER13 | .....  | 1 | 1 | 1 | 2 | 1 | 1 | 1 | 1 | 1 | 4 | 1 | 2 | 1 | 2 | 1 | 2 | 2 | 2                                                                      | .....      |       |
| PER14 | .....  | 1 | 1 | 1 | 1 | 1 | 1 | 1 | 1 | 1 | 1 | 1 | 1 | 1 | 1 | 1 | 2 | 2 | 2                                                                      | .DR.A..... |       |
| PER15 | .....  | 1 | 1 | 1 | 1 | 2 | 1 | 1 | 1 | 1 | 2 | 2 | 1 | 2 | 1 | 2 | 1 | 2 | 2                                                                      | .DR.A..... |       |
| PER16 | .....  | 1 | 1 | 2 | 1 | 1 | 2 | 1 | 1 | 1 | 1 | 2 | 2 | 1 | 2 | 1 | 2 | 2 | 2                                                                      | .....      |       |
| PER17 | .....  | 1 | 1 | 1 | 2 | 1 | 1 | 1 | 1 | 2 | 1 | 2 | 1 | 2 | 1 | 2 | 2 | 2 | 2                                                                      | .....      |       |
| PER18 | .....  | 1 | 1 | 1 | 1 | 1 | 1 | 1 | 1 | 3 | 1 | 1 | 1 | 1 | 1 | 1 | 2 | 2 | 2                                                                      | .....      |       |
| PER19 | .....  | 1 | 1 | 1 | 1 | 1 | 1 | 1 | 1 | 1 | 1 | 1 | 1 | 1 | 1 | 1 | 2 | 2 | 2                                                                      | .....      |       |
| PER20 | .....  | 1 | 1 | 1 | 2 | 1 | 1 | 1 | 1 | 2 | 1 | 2 | 1 | 2 | 1 | 2 | 2 | 2 | .DR.A.....                                                             |            |       |
| PER21 | .....  | 1 | 1 | 1 | 1 | 2 | 1 | 1 | 1 | 2 | 2 | 1 | 2 | 1 | 2 | 1 | 2 | 2 | 2                                                                      | .DR.A..... |       |
| PER22 | .....  | 1 | 1 | 1 | 1 | 1 | 2 | 1 | 1 | 1 | 1 | 2 | 1 | 2 | 1 | 2 | 1 | 2 | 2                                                                      | .DR.A..... |       |
| PER23 | .....  | 1 | 1 | 1 | 2 | 1 | 1 | 1 | 1 | 2 | 2 | 1 | 1 | 1 | 2 | 2 | 2 | 2 | 2                                                                      | .....      |       |

- 1 GDRADGQPA
- 2 GDRAAGQPA
- 3 GNRADGQPA
- 4 GDRAGGQPA
- 5 GDRAAGHPA
- 6 GDRAVGQPA

B)

|       |                 |                    |                                                              |
|-------|-----------------|--------------------|--------------------------------------------------------------|
| PER24 | NKLKQPEDGAGDQPG | 11111121113131111  | GDAGAGQGNNEGANAPNEKSVEYLDKVRTTVGTETWTPCSVTCGVGVRVRRRVYSANKKP |
| PER25 | .....           | 311111121113131111 | .....                                                        |
| PER26 | .....           | 11111121111131111  | .....                                                        |

- 1 ANGAGNQPG
- 2 ANGADDQPG
- 3 ANGAGDQPG
